# Supplementary material for: Triglyceride-glucose (TyG) index is a predictor of arterial stiffness, incidence of diabetes, cardiovascular disease, and all-cause and cardiovascular mortality: A longitudinal two-cohort analysis
Source: PubMed Central journal article supplement (PMC9846351; doi:10.3389/fcvm.2022.1035105), 2023-01-04
Supplement: Data_Sheet_1.pdf [file Data_Sheet_1.pdf]

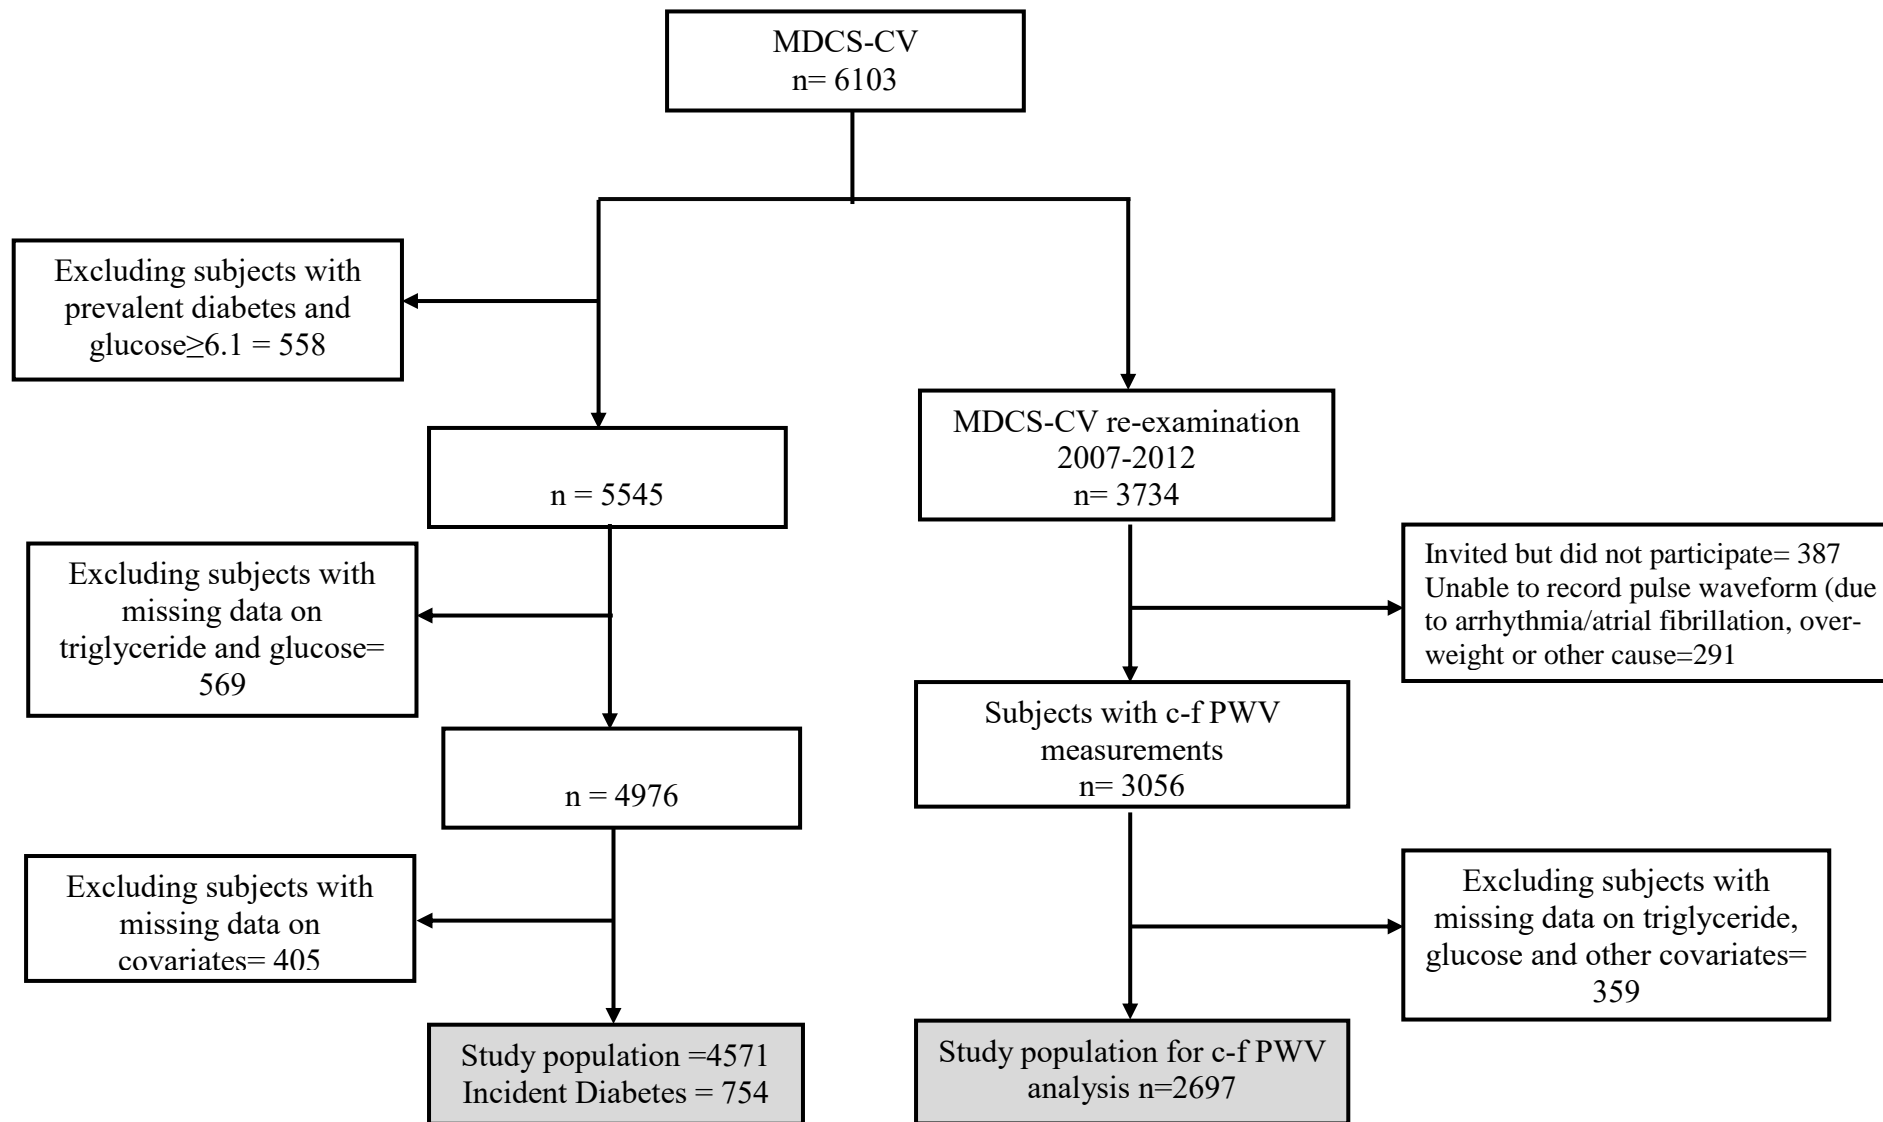

**Supplementary Figure 1: Flowchart for the study population in MDCS-CV**

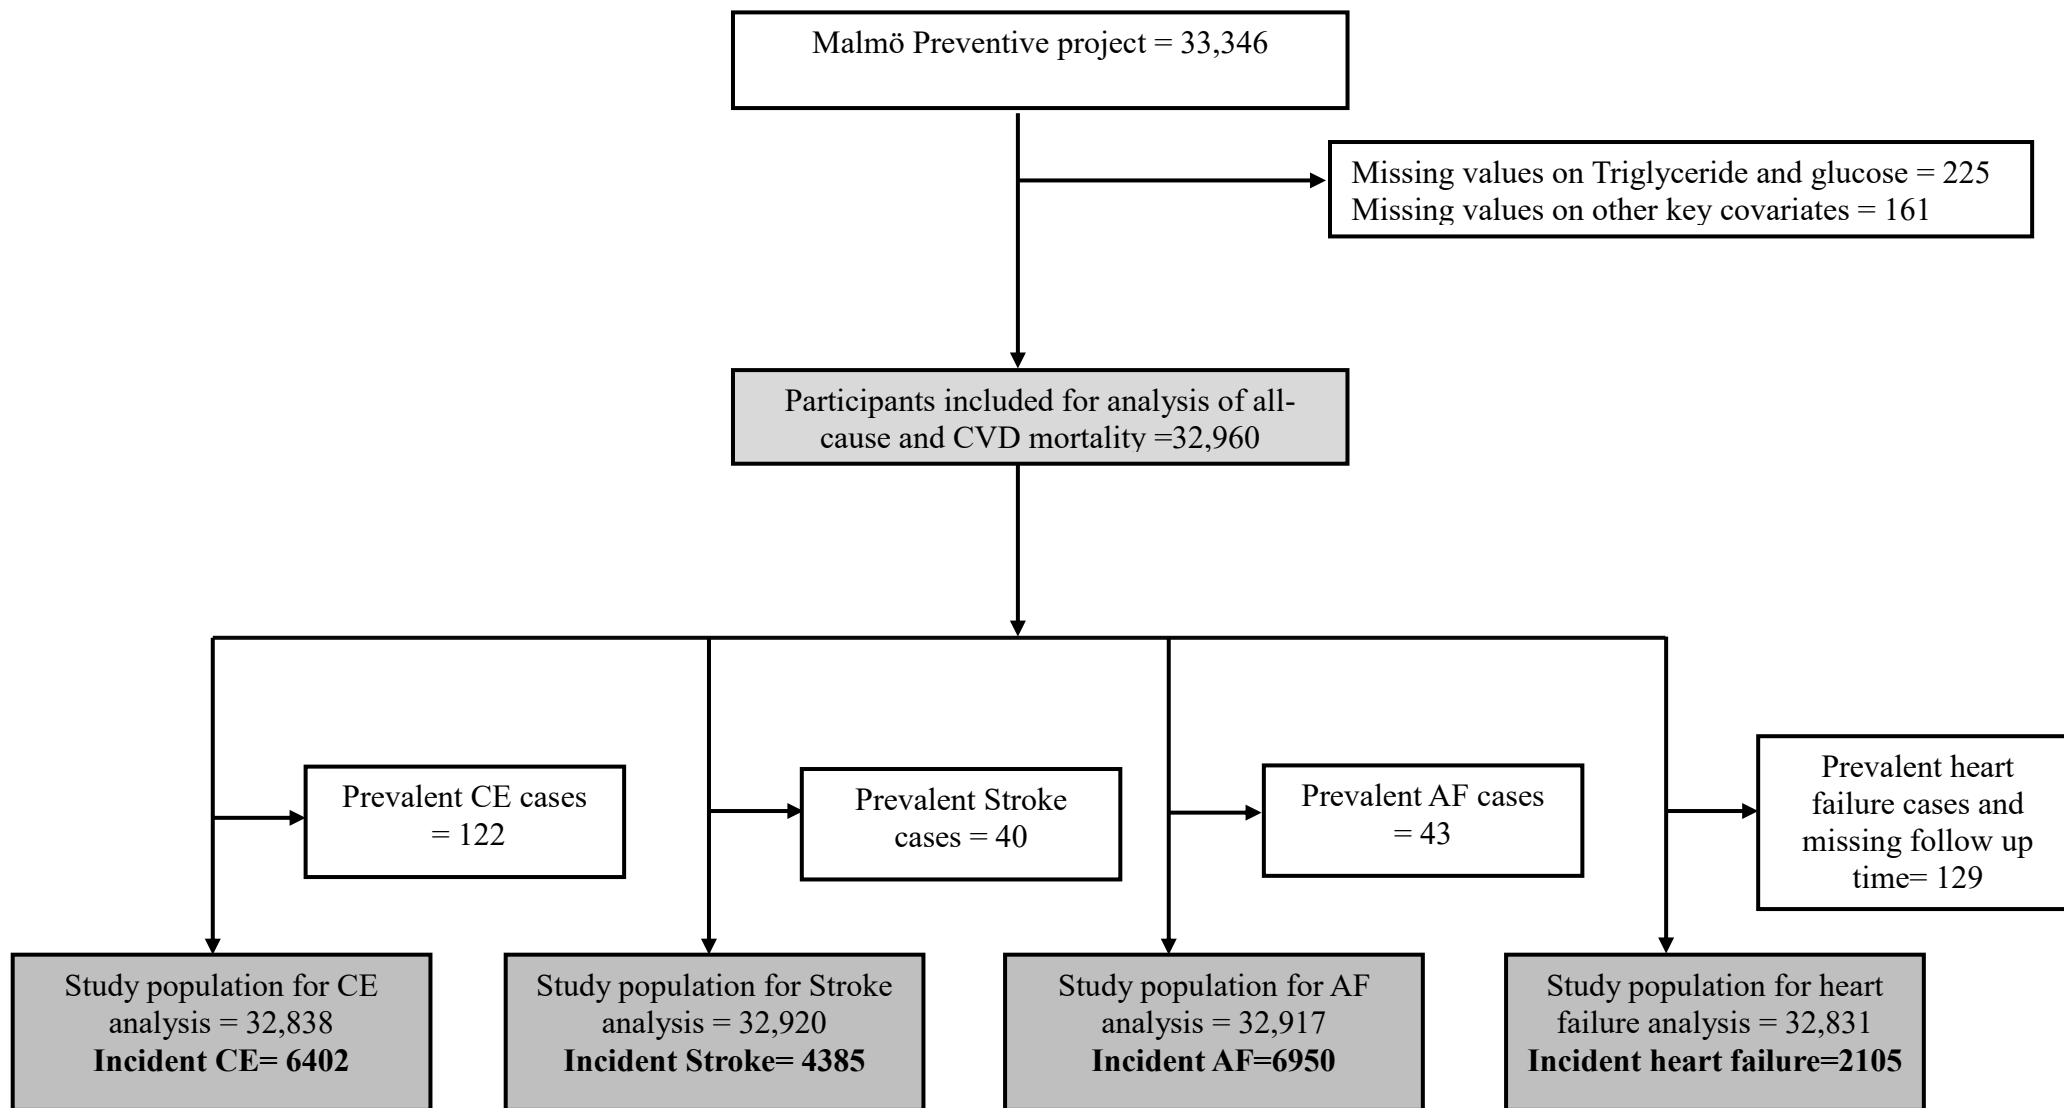

**Supplementary Figure 2: Flowchart for the study population in MPP**

**Supplementary Table 1: Baseline characteristics of participants in the MDCS-CV**

|                                    | c-f PWV analysis | Incident Diabetes analysis |
|------------------------------------|------------------|----------------------------|
| Number of subjects                 | 2697             | 4571                       |
| TyG index                          | 3.92-5.50        | 4.55(±0.23)                |
| Age , years                        | 56.05(±5.66)     | 57.45(±5.96)               |
| Men, n(%)                          | 1028(38.1)       | 1806(39.5)                 |
| Waist , cm                         | 81.70(±11.74)    | 82.64(±12.25)              |
| Current Smokers n (%)              | 477(17.7)        | 1019(22.3)                 |
| SBP (mmHg)                         | 137.90(±17.72)   | 140.53(±18.73)             |
| LDL-cholesterol (mmol/L)           | 4.13(±0.97)      | 4.17(±0.98)                |
| HDL-cholesterol (mmol/L)           | 1.41(±0.37)      | 1.40(±0.37)                |
| Antihypertensive medication, n(%)  | 326(12.1)        | 665(14.5)                  |
| Lipid-lowering medication, n(%)    | 52(1.9)          | 96(2.1)                    |
| CRP, mg/L*                         | 1.20(0.60-2.35)  | 1.30(0.60-2.70)            |
| HOMA2-IR *                         | 0.80(0.50-1.10)† | 0.80(0.50-1.20) ‡          |
| Prevalent diabetes, n(%)           | 144(5.3)         | -                          |
| C-f PWV, m/s                       | 10.50(±2.47)     | -                          |
| Age at follow up, years            | 72.15(±5.57)     | -                          |
| Heart rate at follow up, beats/min | 62.80(±9.89)     | -                          |
| MAP, mmHg                          | 95.66(±10.65)    | -                          |

Data presented as mean (±standard deviation) unless otherwise stated

\*Median (25<sup>th</sup>-75<sup>th</sup> percentile)

† n=2673

‡ n=4522

**Supplementary Table 2: Baseline characteristics of participants in MPP across the quartiles of TyG index**

|                                    | Q1             | Q2             | Q3             | Q4             | P for trend |
|------------------------------------|----------------|----------------|----------------|----------------|-------------|
| Number of subjects                 | 8236           | 8248           | 8250           | 8226           |             |
| TyG index                          | 3.38-4.38      | 4.38-4.55      | 4.55-4.74      | 4.74-6.70      |             |
| Age, years                         | 46.41(±7.73)   | 45.69(±7.48)   | 45.24(±7.44)   | 45.26(±6.92)   | <0.001      |
| Men, n (%)                         | 4124(50.1)     | 5362(65)       | 5999(72.7)     | 6756(82.1)     | <0.001      |
| BMI (kg/m <sup>2</sup> )           | 23.18(±2.96)   | 23.96(±3.28)   | 24.76(±3.52)   | 26.35(±3.83)   | <0.001      |
| Systolic blood pressure (mmHg)     | 122.37(±14.37) | 124.75(±14.85) | 126.75(±15.20) | 131.21(±16.25) | <0.001      |
| Smokers (current and former), n(%) | 4401(43.1)     | 5123(62.1)     | 5440(65.9)     | 5800(70.5)     | <0.001      |
| Cholesterol (mmol/L)               | 5.28(±0.96)    | 5.54(±0.99)    | 5.74(±1.05)    | 6.13(±1.13)    | <0.001      |
| Prevalent diabetes, n (%)          | 28(0.3)        | 46(0.6)        | 93(1.1)        | 640(7.8)       | <0.001      |
| Antihypertensive medication, n (%) | 276(3.4)       | 345(4.2)       | 415(5.0)       | 759(9.2)       | <0.001      |
| High alcohol consumption, n (%)    | 719(8.7)       | 910(11.0)      | 1037(12.6)     | 1386(16.8)     | <0.001      |
| Physically activity, men n (%)     | 5966(72.4)     | 5077(61.6)     | 4610(55.9)     | 4029(49.0)     | <0.001      |
| Physically active, women n (%)     | 2922(35.5)     | 1988(24.1)     | 1595(19.3)     | 1308(15.9)     | <0.001      |

**Supplementary Table 3: Association between TyG index and c-f PWV (n=2697)**

| TyG index      | Beta coefficient | 95% Confidence interval |             | P value |
|----------------|------------------|-------------------------|-------------|---------|
|                |                  | Lower bound             | Upper bound |         |
| <b>Model 1</b> | 1.50             | 1.17                    | 1.82        | <0.001  |
| <b>Model 2</b> | 0.77             | 0.41                    | 1.14        | <0.001  |
| <b>Model 3</b> | 0.60             | 0.19                    | 1.01        | 0.005   |
| <b>Model 4</b> | 0.61             | 0.20                    | 1.03        | 0.018   |

Model 1: Adjusted for sex, MAP, heart rate and age at follow-up and age at baseline

Model 2: Adjusted for sex, MAP, heart rate and age at follow-up, baseline age, smoking habits, systolic blood pressure, waist circumference, diabetes, use of anti-hypertensive medication and use of lipid-lowering medication

Model 3: Adjusted for sex, MAP, heart rate and age at follow-up, baseline age, smoking habits, systolic blood pressure, waist circumference, diabetes, use of anti-hypertensive medication, use of lipid-lowering medication, HDL and LDL

Model 4: Model 3 + CRP
